# Supplementary material
Source: Springer Nature journal article supplement (https://www.springermedizin.de/resource/supplementary/13006_2012_142_MOESM2_ESM.pdf/9628066)

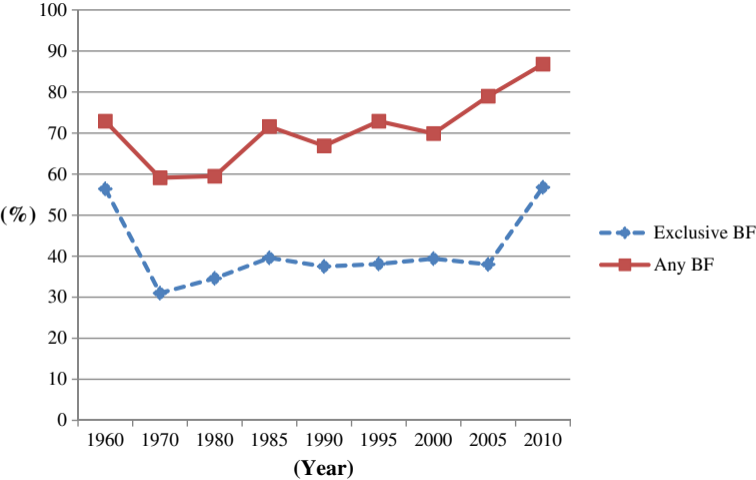

Supplement: MOESM2 [file 9628066]
